# Supplementary material for: Co-expression Network Analysis Identified COL8A1 Is Associated with the Progression and Prognosis in Human Colon Adenocarcinoma
Source: Springer Nature journal article supplement (doi:10.1007/s10620-018-4996-5), 2018-03-01
Supplement: MOESM1 [file 15500300]

Supplementary Table 1: The results of gene set enrichment analysis (GSEA)

| NAME | SIZE | NOM p-val | FDR q-val |
| --- | --- | --- | --- |
| KEGG_FOCAL_ADHESION | 188 | 0 | 0.007 |
| KEGG_REGULATION_OF_ACTIN_CYTOSKELETON | 196 | 0 | 0.006 |
| KEGG_DILATED_CARDIOMYOPATHY | 89 | 0 | 0.009 |
| KEGG_LYSOSOME | 115 | 0 | 0.009 |
| KEGG_HYPERTROPHIC_CARDIOMYOPATHY_HCM | 82 | 0.002 | 0.011 |
| KEGG_LEUKOCYTE_TRANSENDOTHELIAL_MIGRATION | 107 | 0 | 0.013 |
| KEGG_FC_GAMMA_R_MEDIATED_PHAGOCYTOSIS | 87 | 0 | 0.012 |
| KEGG_ECM_RECEPTOR_INTERACTION | 81 | 0 | 0.011 |
| KEGG_PATHWAYS_IN_CANCER | 315 | 0 | 0.012 |
| KEGG_VASCULAR_SMOOTH_MUSCLE_CONTRACTION | 110 | 0.004 | 0.014 |
| KEGG_RENAL_CELL_CARCINOMA | 69 | 0 | 0.014 |
| KEGG_AXON_GUIDANCE | 127 | 0 | 0.015 |
| KEGG_GAP_JUNCTION | 75 | 0.002 | 0.014 |
| KEGG_MELANOMA | 71 | 0.002 | 0.021 |
| KEGG_CELL_ADHESION_MOLECULES_CAMS | 125 | 0.002 | 0.021 |
| KEGG_TGF_BETA_SIGNALING_PATHWAY | 82 | 0 | 0.021 |
| KEGG_ADHERENS_JUNCTION | 73 | 0 | 0.020 |
| KEGG_WNT_SIGNALING_PATHWAY | 144 | 0.001 | 0.020 |
| KEGG_MTOR_SIGNALING_PATHWAY | 46 | 0 | 0.023 |
| KEGG_ENDOCYTOSIS | 157 | 0 | 0.022 |
| KEGG_MELANOGENESIS | 98 | 0.002 | 0.023 |
| KEGG_ARRHYTHMOGENIC_RIGHT_VENTRICULAR_CARDIOMYOPATHY_ARVC | 73 | 0.008 | 0.023 |
| KEGG_PANCREATIC_CANCER | 69 | 0 | 0.024 |
| KEGG_ADIPOCYTOKINE_SIGNALING_PATHWAY | 66 | 0.002 | 0.026 |
| KEGG_ACUTE_MYELOID_LEUKEMIA | 56 | 0.008 | 0.025 |
| KEGG_PROSTATE_CANCER | 87 | 0.002 | 0.026 |
| KEGG_CHRONIC_MYELOID_LEUKEMIA | 72 | 0.002 | 0.028 |
| KEGG_CALCIUM_SIGNALING_PATHWAY | 171 | 0.006 | 0.028 |
| KEGG_TIGHT_JUNCTION | 125 | 0 | 0.037682 |
| KEGG_GLYCOSPHINGOLIPID_BIOSYNTHESIS_GANGLIO_SERIES | 15 | 0.022222 | 0.03873 |
| KEGG_PATHOGENIC_ESCHERICHIA_COLI_INFECTION | 43 | 0.004065 | 0.039337 |
| KEGG_VASOPRESSIN_REGULATED_WATER_REABSORPTION | 44 | 0.011952 | 0.040731 |
| KEGG_EPITHELIAL_CELL_SIGNALING_IN_HELICOBACTER_PYLORI_INFECTION | 62 | 0.008214 | 0.042073 |
| KEGG_MAPK_SIGNALING_PATHWAY | 256 | 0.002096 | 0.041987 |
| KEGG_GLIOMA | 63 | 0.002092 | 0.042251 |
| KEGG_SNARE_INTERACTIONS_IN_VESICULAR_TRANSPORT | 34 | 0.029412 | 0.042938 |
| KEGG_VIRAL_MYOCARDITIS | 67 | 0.024291 | 0.042265 |
| KEGG_SMALL_CELL_LUNG_CANCER | 82 | 0.002169 | 0.047062 |
